# Supplementary material for: Analysis of Co-inhibitory Receptor Expression in COVID-19 Infection Compared to Acute Plasmodium falciparum Malaria: LAG-3 and TIM-3 Correlate With T Cell Activation and Course of Disease
Source: PubMed Central journal article supplement (PMC7479337; doi:10.3389/fimmu.2020.01870), 2020-08-26
Supplement: Data_Sheet_1.pdf [file Data_Sheet_1.pdf]

# Supplementary Figure 1

## Panel 1

| Fluorochrome | Antigen | Clone    | Provider       |
|--------------|---------|----------|----------------|
| BUV 737      | CD4     | SK3      | BD Biosciences |
| BUV 395      | CD38    | HB7      | BD Biosciences |
| BV785        | TIM-3   | F38-2E2  | Biologend      |
| BV711        | HLA-DR  | L243     | Biologend      |
| BV650        | CCR7    | G043H7   | Biologend      |
| BV605        | TIGIT   | A15153G  | Biologend      |
| BV510        | CD45RO  | UCHL1    | Biologend      |
| BV421        | LAG-3   | 11C3C65  | Biologend      |
| PerCp-Cy5.5  | CD8     | RPA-T8   | Biologend      |
| FITC         | CD27    | M-T271   | BD Biosciences |
| PE-Cy7       | CD69    | FN50     | Biologend      |
| PE-Dazzle    | PD1     | EH12.2H7 | Biologend      |
| PE           | BTLA    | J168-540 | BD Biosciences |
| APC-Cy7      | L/D     |          | ThermoFisher   |
|              | CD14    | 63D3     | Biologend      |
|              | CD19    | H1B19    | Biologend      |
| AF700        | CD3     | UCHT1    | Biologend      |

## Panel 2

| Fluorochrome | Antigen | Clone    | Provider       |
|--------------|---------|----------|----------------|
| BUV 737      | CD4     | SK3      | BD Biosciences |
| BUV 395      | CD226   | DX11     | BD Biosciences |
| BV785        | CD127   | A019D5   | Biologend      |
| BV711        | T-bet   | 4B10     | Biologend      |
| BV650        | CCR7    | G043H7   | Biologend      |
| BV605        | TIGIT   | A15153G  | Biologend      |
| BV510        | CD45RO  | UCHL1    | Biologend      |
| BV421        | PD1     | EH12.2H7 | Biologend      |
| PerCp-Cy5.5  | CD8     | RPA-T8   | Biologend      |
| FITC         | CD27    | M-T271   | BD Biosciences |
| PE-Cy7       | LAG-3   | 3DS223H  | eBioscience    |
| PE-Dazzle    | Eomes   | WD1928   | Invitrogen     |
| APC-Cy7      | L/D     |          | ThermoFisher   |
|              | CD14    | 63D3     | Biologend      |
|              | CD19    | H1B19    | Biologend      |
| AF700        | CD3     | UCHT1    | Biologend      |

**Supplementary Figure 1. Overview of fluorochrome-conjugated antibodies for flow cytometry.**

## Supplementary Figure 2

| Identifier | Panel 1 | Panel 2 | Mild | Severe | Follow-Up |
|------------|---------|---------|------|--------|-----------|
| C1         |         | X       |      |        |           |
| C2         | X       | X       | X    |        |           |
| C3         | X       | X       |      |        |           |
| C4         | X       |         |      | X      | X         |
| C5         | X       | X       |      | X      |           |
| C6         | X       | X       | X    |        |           |
| C7         | X       | X       |      |        |           |
| C8         | X       | x       | X    |        |           |
| C9         |         | X       | X    |        |           |
| C10        | X       | X       |      | X      |           |
| C11        | X       | X       | X    |        |           |
| C12        | X       | X       |      | X      | X         |
| C13        | X       |         |      |        |           |
| C14        | X       | X       |      |        |           |
| C15        | X       | X       | X    |        |           |
| C16        | X       | X       |      |        |           |
| C17        | X       |         |      |        |           |
| C18        | X       |         |      | X      |           |
| C19        | X       |         |      |        |           |
| C20        | X       | X       |      |        | X         |
| M1         | X       | X       |      |        |           |
| M2         | X       | X       |      |        |           |
| M3         |         | X       |      |        |           |
| M4         | X       | X       |      |        |           |
| M5         |         | X       |      |        |           |
| M6         |         | X       |      |        |           |
| M7         | X       | X       |      |        |           |
| M8         | X       | X       |      |        |           |
| M9         |         | X       |      |        |           |
| M10        | X       | X       |      |        |           |

C1-C20: COVID-19 cohort M1-M10: Malaria cohort

**Supplementary Figure 2. Overview of processed samples and panels used for analysis.**

## Supplementary Figure 3

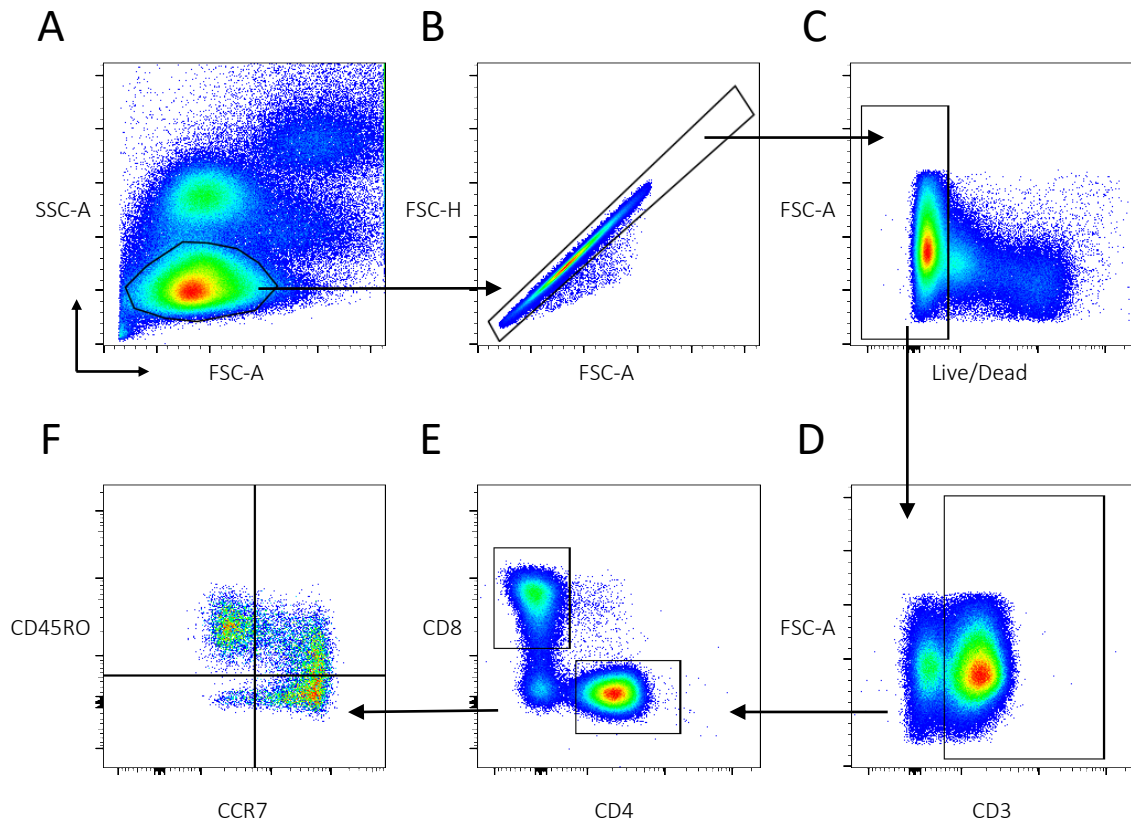

**Supplementary Figure 3. Representative dot plots of PBMC showing the gating strategy for T cells. (A)** Lymphocytes were first identified by a low forward scatter (FSC) and low side scatter (SSC) gate. **(B)** Doublets were excluded by a forward scatter height (FSC-H) and forward scatter area (FSC-A) gate. **(C)** Only live cells were included. **(D)** Only CD3<sup>+</sup> cells were included. **(E)** CD8<sup>+</sup> and CD4<sup>+</sup> T cells were identified. **(F)** Naïve and memory subsets were identified using CD45RO and CCR7.

# Supplementary Figure 4

## A

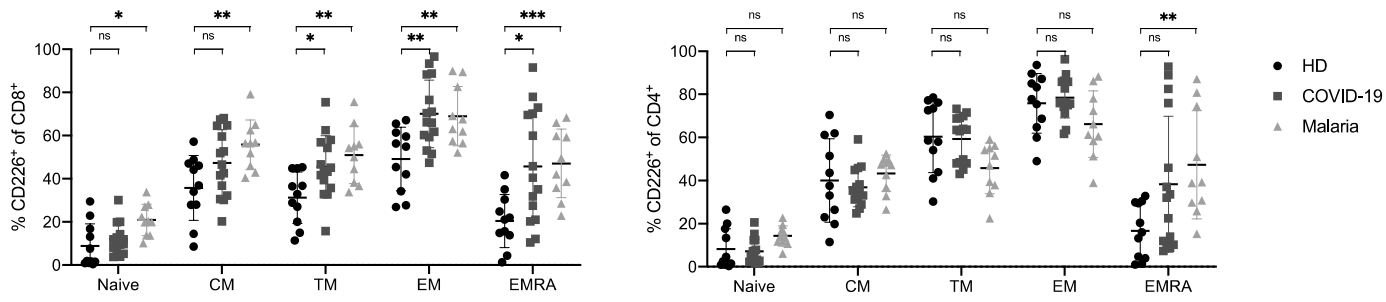

## B

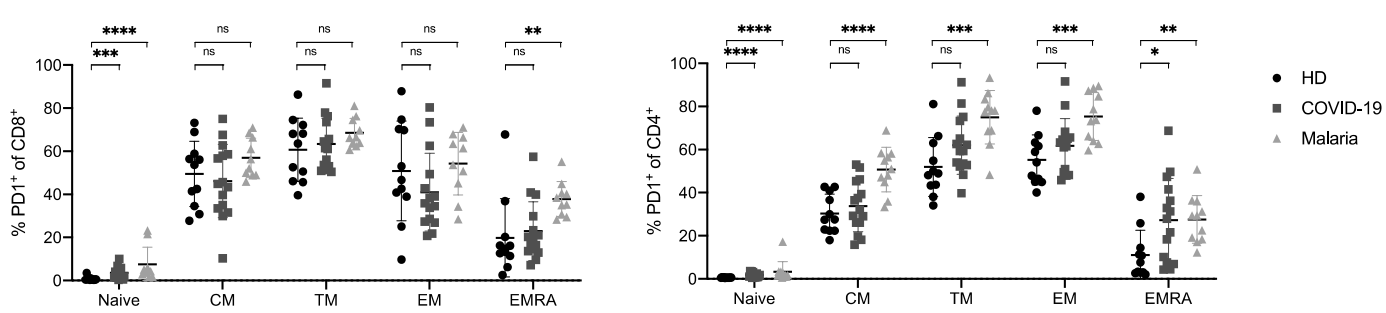

## C

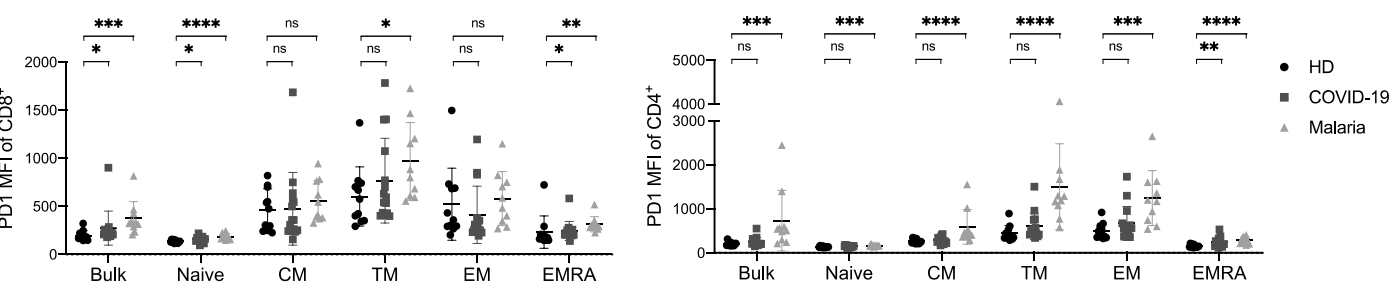

## D

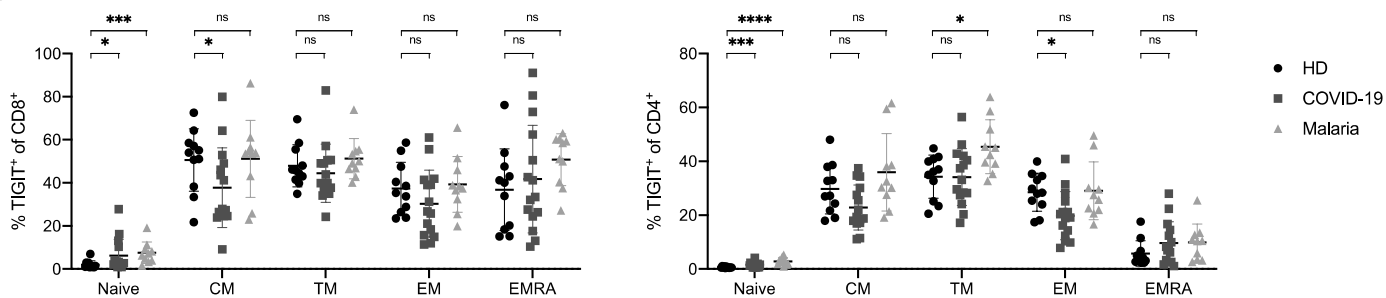

**Supplementary Figure 4. Frequency of co-stimulatory and co-inhibitory receptors on naïve and memory subsets.** Frequency of CD226 (A), PD1 (B), MFI of PD1 (C) and frequency of TIGIT (D) on naïve, central memory (CM), transitional memory (TM), effector memory (EM) and terminal effector memory (EMRA) CD8<sup>+</sup> and CD4<sup>+</sup> T cells in COVID-19 and malaria patients and healthy donors. P values were calculated by Mann-Whitney test. P-values smaller than 0.05 were considered significant, where \*, \*\*, \*\*\* and \*\*\*\* indicate p-values between 0.01 to 0.05, 0.001 to 0.01, 0.0001 to 0.001 and <0.0001 respectively.

# Supplementary Figure 5

## A

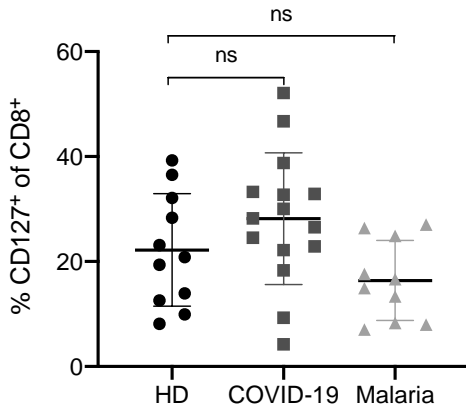

## B

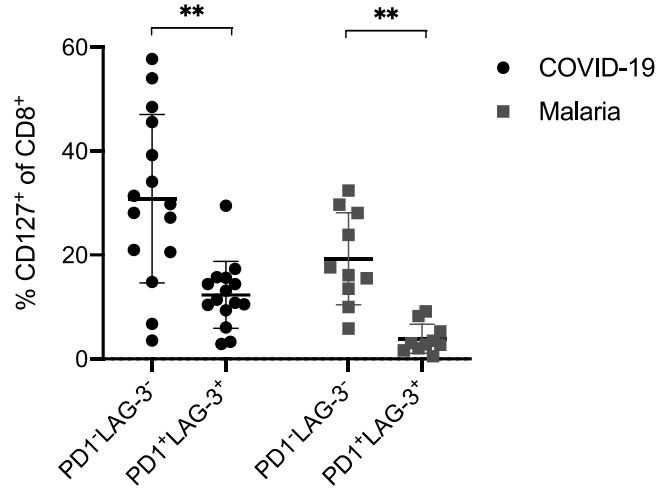

**Supplementary Figure 5. Frequency of CD127 on bulk CD8<sup>+</sup> T cells and CD8<sup>+</sup> T cells co-expressing inhibitory receptors. (A)** Frequency of CD127 on CD8<sup>+</sup> T cells in COVID-19 and malaria patients as well as healthy donors. **(B)** Frequency of CD127 on PD1<sup>-</sup>LAG-3<sup>-</sup> and PD1<sup>+</sup>LAG-3<sup>+</sup> CD8<sup>+</sup> T cells in COVID-19 and malaria patients. P values were calculated by Wilcoxon test for paired analyses and Mann-Whitney test for unpaired analyses. P-values smaller than 0.05 were considered significant, where \*, \*\*, \*\*\* and \*\*\*\* indicate p-values between 0.01 to 0.05, 0.001 to 0.01, 0.0001 to 0.001 and <0.0001 respectively.

# Supplementary Figure 6

A

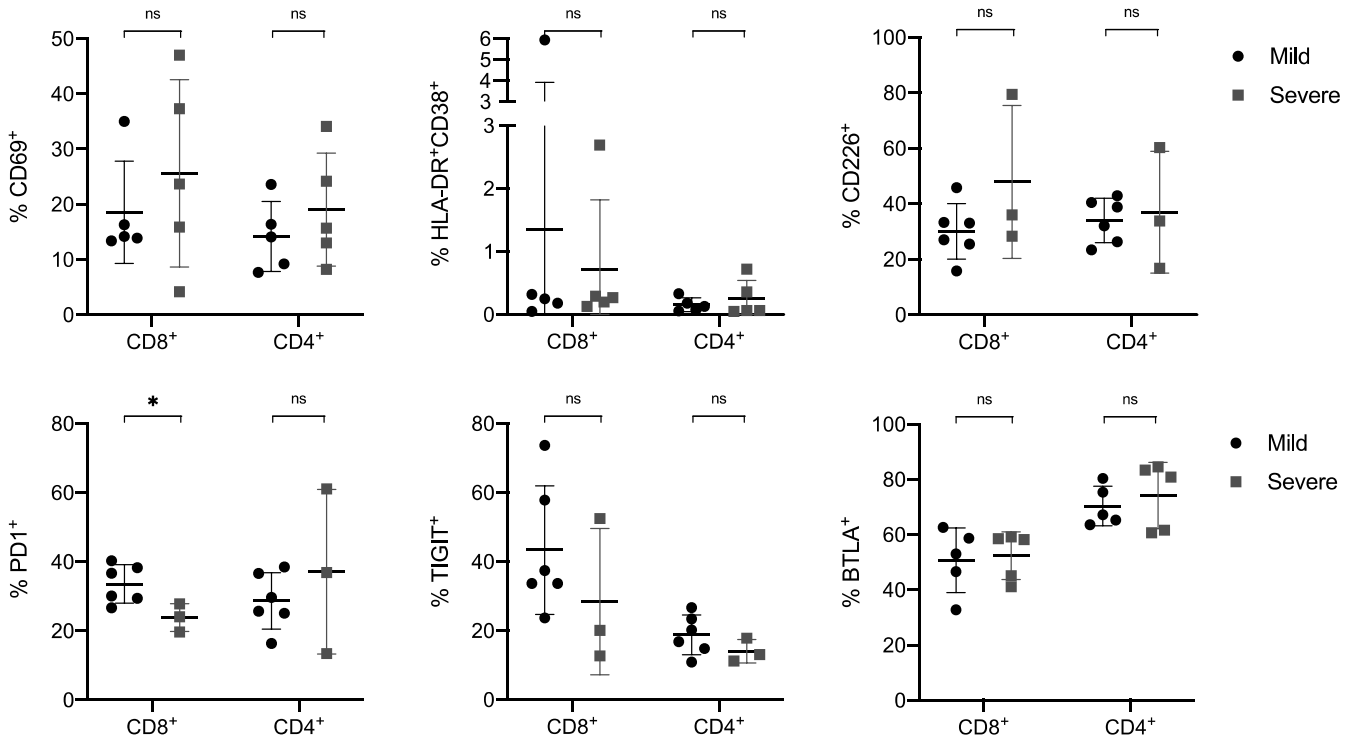

**Supplementary Figure 6. Frequency of co-stimulatory and co-inhibitory receptors on CD8<sup>+</sup> and CD4<sup>+</sup> T cells in mild and severe COVID-19 patients. (A)** Frequencies of CD69<sup>+</sup>, HLA-DR<sup>+</sup>CD38<sup>+</sup>, CD226<sup>+</sup>, PD1<sup>+</sup>, TIGIT<sup>+</sup> and BTLA<sup>+</sup> CD8<sup>+</sup> and CD4<sup>+</sup> T cells in mild and severe COVID-19 patients. P values were calculated by Mann-Whitney test. P-values smaller than 0.05 were considered significant, where \*, \*\*, \*\*\* and \*\*\*\* indicate p-values between 0.01 to 0.05, 0.001 to 0.01, 0.0001 to 0.001 and <0.0001 respectively.
